# Supplementary material for: Secondary IgA Nephropathy Shares the Same Immune Features With Primary IgA Nephropathy
Source: PubMed Central journal article supplement — Kidney Int Rep. 2019 Nov 6;5(2):165–72. doi: 10.1016/j.ekir.2019.10.012 (PMC7000803; doi:10.1016/j.ekir.2019.10.012), 2019-11-06

## Supplemental materials

**Title:** Secondary IgA Nephropathy Shares the Same Immune Features with Primary IgA Nephropathy

**Authors:** Manliu Wang, Jicheng Lv, Xue Zhang, Pei Chen, Minghui Zhao, Hong Zhang

### List

**Table S1.** Various kinds of glomerulonephritis patients

**Figure S1.** Plasma immunoglobulin A1 (IgA1), galactose-deficient IgA1 (Gd-IgA1) and adjusted galactose-deficient IgA1 (AD-Gd-IgA1) levels in sub-groups of enrolled patients and healthy volunteers. (a) Plasma total IgA1; (b) plasma Gd-IgA1; (c) plasma Ad-Gd-IgA1. U/ml, unit/ml. GN, glomerulonephritis cases; LN, lupus nephritis cases; HC, healthy controls; IgAN, IgA nephropathy cases; Cirrhosis, cirrhosis combined with IgAN cases; RA, rheumatoid arthritis combined with IgAN cases; AS, ankylosing spondylitis combined with IgAN cases; SS, Sjögren's syndrome combined with IgAN cases; Psoriasis, psoriasis combined with IgAN cases; UC, ulcerative colitis combined with IgAN cases; Neoplasia, neoplasia combined with IgAN cases; Infections, infections combined with IgAN cases; COB, chronic obstructive bronchiolitis combined with IgAN cases; PF, pulmonary fibrosis combined with IgAN cases.

**Figure S2.** Detection of circulating IgA/IgG immune complex (IgA/IgG-IC) in sub-groups of

enrolled patients and healthy volunteers. (a) IgA1-IgG complex; (b) IgA-IgG complex. U/ml, unit/ml. GN, glomerulonephritis cases; LN, lupus nephritis cases; HC, healthy controls; IgAN, IgA nephropathy cases; Cirrhosis, cirrhosis combined with IgAN cases; RA, rheumatoid arthritis combined with IgAN cases; AS, ankylosing spondylitis combined with IgAN cases; SS, Sjögren's syndrome combined with IgAN cases; Psoriasis, psoriasis combined with IgAN cases; UC, ulcerative colitis combined with IgAN cases; Neoplasia, neoplasia combined with IgAN cases; Infections, infections combined with IgAN cases; COB, chronic obstructive bronchiolitis combined with IgAN cases; PF, pulmonary fibrosis combined with IgAN cases.

**Figure S3.** Glomerular deposition of galactose-deficient IgA1 in patients with IgA nephropathy (IgAN) combined cirrhosis. Double staining with anti-Gd-IgA1 mAb (Red) and anti-IgA1 mAb (Green). Merged figures were also added to the DAPI channel. (Bars = 50  $\mu$ m).

**Table S1 | Various kinds of glomerulonephritis patients**

| <b>Types of glomerular diseases</b>                     | <b>Patients (n)</b> |
|---------------------------------------------------------|---------------------|
| Membranous Nephropathy                                  | 5                   |
| Minimal Change Disease                                  | 6                   |
| Antineutrophil cytoplasm Antibody-associated Vasculitis | 4                   |
| Crescentic Glomerulonephritis                           | 3                   |
| Focal Segmental Glomerular Sclerosis                    | 5                   |
| Membranoproliferative Glomerulonephritis                | 2                   |
| Total                                                   | 25                  |

**Figure S1. Plasma immunoglobulin A1 (IgA1), galactose-deficient IgA1 (Gd-IgA1) and adjusted galactose-deficient IgA1 (AD-Gd-IgA1) levels in sub-groups of enrolled patients and healthy volunteers.** (a) Plasma total IgA1; (b) plasma Gd-IgA1; (c) plasma Ad-Gd-IgA1. U/ml, unit/ml. GN, glomerulonephritis cases; LN, lupus nephritis cases; HC, healthy controls; IgAN, IgA nephropathy cases; Cirrhosis, cirrhosis combined with IgAN cases; RA, rheumatoid arthritis combined with IgAN cases; AS, ankylosing spondylitis combined with IgAN cases; SS, Sjögren's syndrome combined with IgAN cases; Psoriasis, psoriasis combined with IgAN cases; UC, ulcerative colitis combined with IgAN cases; Neoplasia, neoplasia combined with IgAN cases; Infections, infections combined with IgAN cases; COB, chronic obstructive bronchiolitis combined with IgAN cases; PF, pulmonary fibrosis combined with IgAN cases.

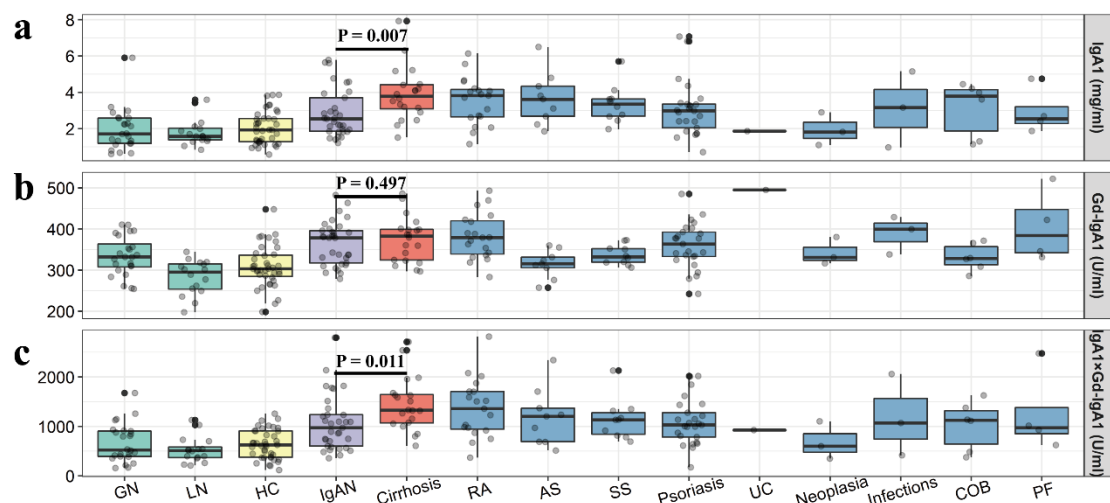

**Figure S2. Detection of circulating IgA/IgG immune complex (IgA/IgG-IC) in sub-groups of enrolled patients and healthy volunteers. (a) IgA1-IgG complex; (b) IgA-IgG complex. U/ml, unit/ml. GN, glomerulonephritis cases; LN, lupus nephritis cases; HC, healthy controls; IgAN, IgA nephropathy cases; Cirrhosis, cirrhosis combined with IgAN cases; RA, rheumatoid arthritis combined with IgAN cases; AS, ankylosing spondylitis combined with IgAN cases; SS, Sjögren's syndrome combined with IgAN cases; Psoriasis, psoriasis combined with IgAN cases; UC, ulcerative colitis combined with IgAN cases; Neoplasia, neoplasia combined with IgAN cases; Infections, infections combined with IgAN cases; COB, chronic obstructive bronchiolitis combined with IgAN cases; PF, pulmonary fibrosis combined with IgAN cases.**

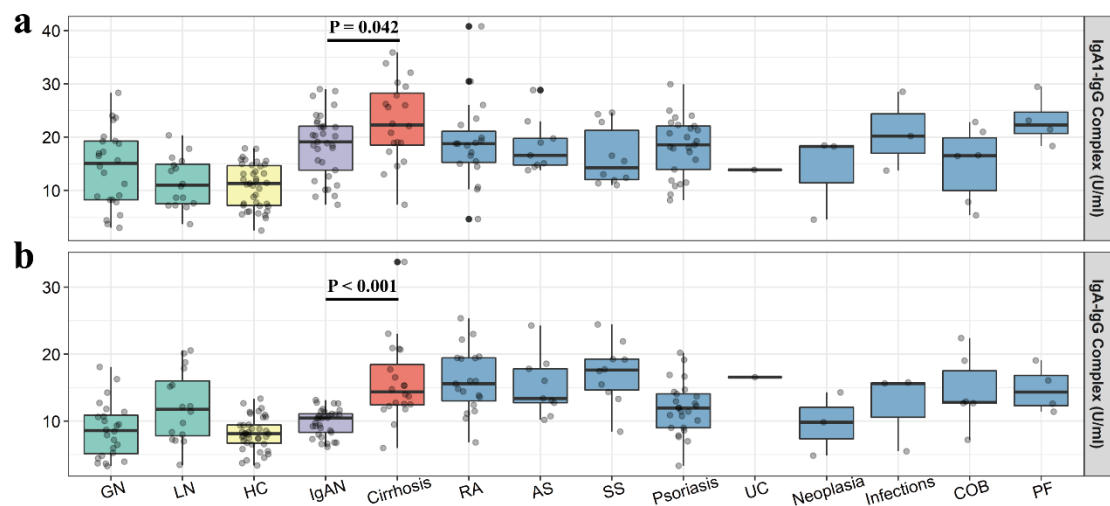

Figure S3. Glomerular deposition of galactose-deficient IgA1 in patients with IgA nephropathy (IgAN) combined cirrhosis. Double staining with anti-Gd-IgA1 mAb (Red) and anti-IgA1 mAb (Green). Merged figures were also added to the DAPI channel. (Bars = 50  $\mu$ m).

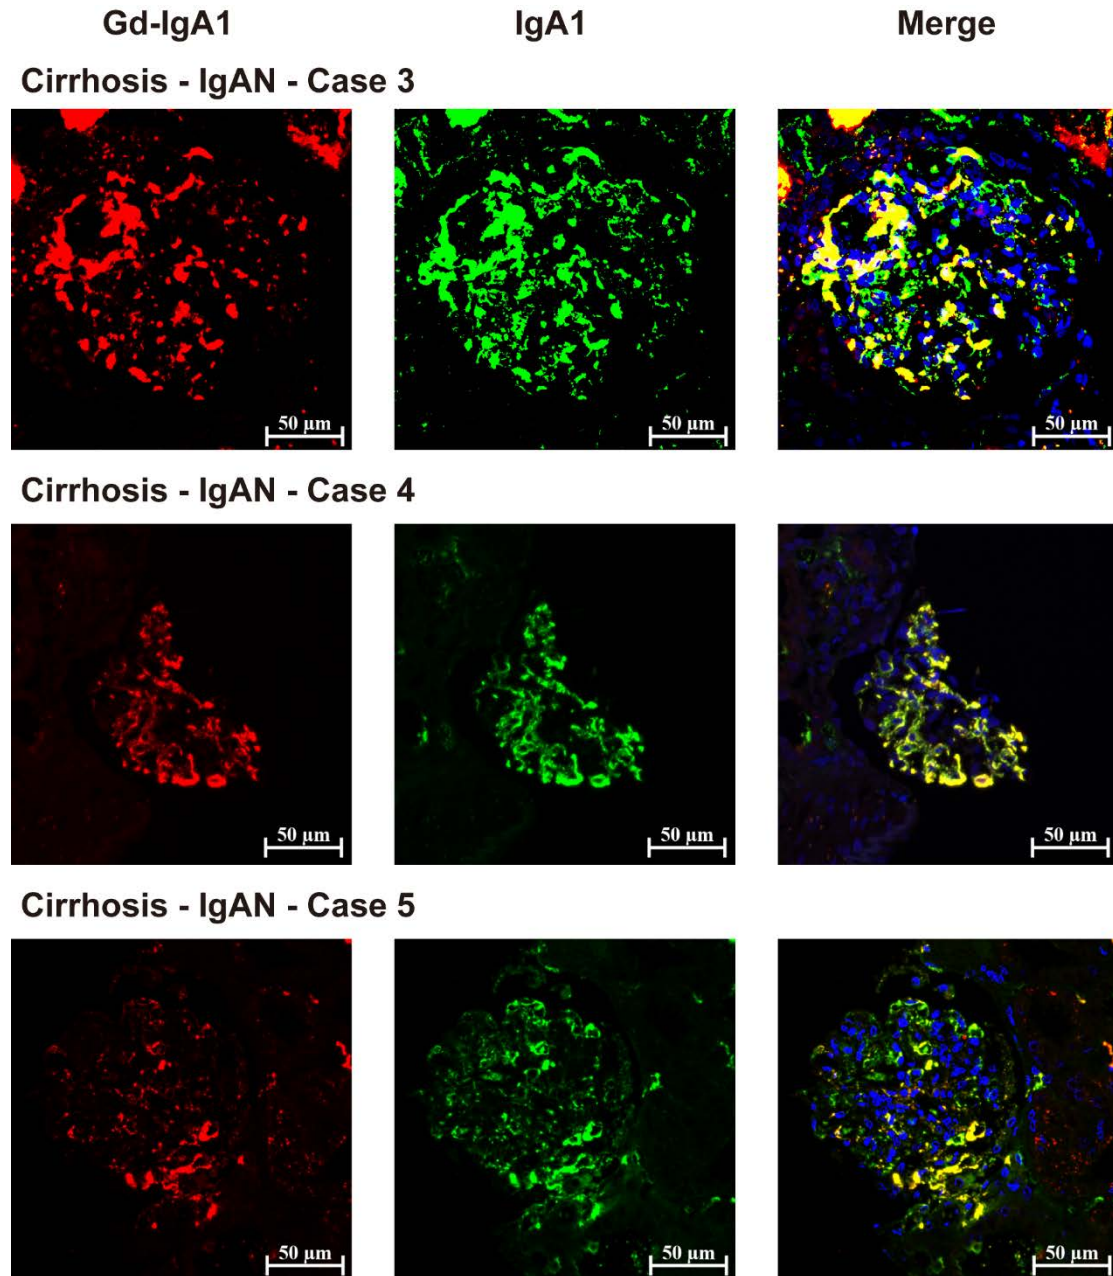

Supplement: mmc1.pdf [file mmc1.pdf]
